# Mining the Gap: Deriving Pregnancy Reference Intervals for Hematology Parameters Using Clinical Datasets

Vilte E. Barakauskas,<sup>a,b,\*†</sup> Mary Kathryn Bohn,<sup>c,†</sup> Emma Branch,<sup>d</sup> Amelie Boutin,<sup>e</sup> Arianne Albert,<sup>d</sup> Sabrina Luke,<sup>d,f</sup> Michelle Dittrick,<sup>a</sup> Victoria Higgins,<sup>g</sup> Khosrow Adeli,<sup>c</sup> Hilary Vallance,<sup>a,b</sup> Benjamin Jung,<sup>c</sup> Kent Dooley,<sup>h</sup> Leanne Dahlgren-Scott,<sup>i</sup> and Wee-Shian Chan<sup>j</sup>

**BACKGROUND:** Physiological changes during pregnancy invalidate use of general population reference intervals (RIs) for pregnant people. The complete blood count (CBC) is commonly ordered during pregnancy, but few studies have established pregnancy RIs suitable for contemporary Canadian mothers. Prospective RI studies are challenging to perform during pregnancy while retrospective techniques fall short as pregnancy and health status are not readily available in the laboratory information system (LIS). This study derived pregnancy RIs retrospectively using LIS data linked to provincial perinatal registry data.

**METHODS:** A 5-year healthy pregnancy cohort was defined from the British Columbia Perinatal Data Registry and linked to laboratory data from two laboratories. CBC and differential RIs were calculated using direct and indirect approaches. Impacts of maternal and pregnancy characteristics, such as age, body mass index, and ethnicity, on laboratory values were also assessed.

**RESULTS:** The cohort contained 143 106 unique term singleton pregnancies, linked to >972 000 CBC results. RIs were calculated by trimester and gestational week. Result trends throughout gestation aligned with previous reports in the literature, although differences in exact RI limits were seen for many tests. Trimester-specific bins may not be appropriate for several CBC parameters that change rapidly within trimesters, including red blood cells (RBCs), some leukocyte parameters, and platelet counts.

**CONCLUSIONS:** Combining information from comprehensive clinical databases with LIS data provides a robust and reliable means for deriving pregnancy RIs. The present analysis also illustrates limitations of using conventional trimester bins during pregnancy, supporting use of gestational age or empirically derived bins for defining CBC normal values during pregnancy.

## Background

Clinical laboratory testing supports diagnosis, prognosis, and monitoring of maternal health and complications (1). Blood volume, hormonal status, and hemostasis change during pregnancy. Plasma volume and iron requirements increase. Despite increased erythropoietin synthesis, red blood cell (RBC) count, hemoglobin, and hematocrit decrease (2, 3). Immune regulation changes to support fetal development and protect against infection, which increases white blood cell (WBC) count and neutrophils (4). Increased spleen size and plasma volume contribute to mild thrombocytopenia (5). Distinguishing between physiological hematological changes and pregnancy complications is challenging due to pregnancy-associated adaptations. Use of gestational age-specific reference intervals (RIs) would therefore improve pregnancy and perinatal care.

Few studies have established gestational age-specific RIs for hematology parameters (6–13). Klajnbard et al. derived trimester-specific RIs for complete blood count (CBC) indices using blood samples collected longitudinally from apparently healthy White pregnant individuals in Denmark (6). More recently, Jin et al. completed a

<sup>a</sup>Department of Pathology and Laboratory Medicine, BC Children's and Women's Hospital, Vancouver, BC, Canada; <sup>b</sup>Department of Pathology and Laboratory Medicine, University of British Columbia, Vancouver, BC, Canada; <sup>c</sup>Clinical Biochemistry, Pediatric Laboratory Medicine, The Hospital for Sick Children and Department of Laboratory Medicine and Pathobiology, University of Toronto, Toronto, ON, Canada; <sup>d</sup>Women's Health Research Institute, BC Women's Hospital, Vancouver, BC, Canada; <sup>e</sup>Department of Pediatrics, Université Laval, and Reproduction, Mother and Youth Health Unit, CHU de Québec-Université Laval Research Center, Québec City, QC, Canada; <sup>f</sup>Research and Surveillance Group, Perinatal Services British Columbia, Vancouver, BC, Canada; <sup>g</sup>Clinical Biochemistry, DynaLIFE Medical Labs and Department of Laboratory Medicine and Pathology, University of Alberta, Edmonton, AB, Canada; <sup>h</sup>Clinical Biochemistry, LifeLabs Medical Laboratories, Victoria, BC, Canada; <sup>i</sup>Department of Obstetrics and Gynecology, University of British Columbia, Vancouver, BC, Canada; <sup>j</sup>Department of Medicine, BC Women's Hospital and Division of General Internal Medicine, Department of Medicine, University of British Columbia, Vancouver, BC, Canada.

\*Address correspondence to this author at: Department of Pathology and Laboratory Medicine, BC Children's and Women's Hospital, 4500 Oak St., Vancouver, BC V6H 3N1, Canada. E-mail vilte.barakauskas@cw.bc.ca.

<sup>†</sup>Co-first authors.

Previous presentation: An initial analysis of 4 CBC parameters was presented as a poster at the 2021 AACC meeting.

Received June 26, 2023; accepted September 27, 2023.

<https://doi.org/10.1093/clinchem/hvad167>

longitudinal study of 565 healthy pregnant Chinese women during early (8–12 weeks) and late (28–37 weeks) gestation (7). Additional longitudinal (8–11) and cross-sectional studies (12, 13) of varying sample sizes have reported trimester-specific CBC RIs using analytical assays from Sysmex (8, 11), Abbott (9, 12), Mindray (13), and Beckman Coulter (10). Studies consistently demonstrate dynamic variation in CBC indices throughout gestation illustrating the need for pregnancy-specific RIs for result interpretation (6–13). However, additional studies in larger populations are needed to investigate the influence of covariates such as maternal age, ethnicity, and body mass index (BMI) on hematology indices in pregnancy. In addition, all published studies have binned RIs by trimester only. Assessment of the appropriateness of using trimester-specific bins as opposed to a continuous or weekly approach for hematology test interpretation is needed.

This study sought to establish gestational-specific RIs for hematology parameters in a large Canadian pregnancy cohort using retrospective data mining techniques. Covariates beyond gestational age that may influence hematology parameters (e.g., maternal age, ethnicity, BMI) were also assessed. Computational modeling was utilized to determine the rate of change in RBC, WBC, and platelet indices throughout gestation.

## Methods

### DATA EXTRACTS AND COHORT DEFINITION

Retrospective data were extracted from laboratory and provincial databases. A 5-year pregnancy cohort was defined by extracting all live births in British Columbia recorded in the British Columbia Perinatal Data Registry (BCPDR) between January 1, 2010 and December 31, 2014. The BCPDR has collected health data on nearly every birth in BC since 2000 and contains records for nearly 1 000 000 births and deliveries, serving as a rich resource for research, surveillance, program delivery, and evaluation (14). Clinical information from the BCPDR was used to exclude high-risk pregnancies—those with complications, preterm delivery, or documented maternal comorbidities—to define a cohort of healthy mothers and healthy term singleton pregnancies to include in RI calculations (Supplemental File 1 in the online Data Supplement details the exclusion criteria). Records without final gestation, date of collection, and/or delivery date were excluded from analyses. Retrospective laboratory data, including CBC, were extracted from BC Children's and Women's Hospital (CW) and LifeLabs BC laboratory information systems (LIS). CW is a tertiary maternity care hospital serving mothers living in the hospital catchment area as well as all BC mothers and neonates requiring higher levels of perinatal care. The CW laboratory used a Sysmex

XE-2100 platform for CBC analysis during the study period. LifeLabs laboratory in BC is the largest provider of outpatient laboratory services in the province. The LifeLabs LIS contains tests performed at LifeLabs as well as the former BCBio Laboratories (acquired by LifeLabs in 2013). These laboratories used Sysmex XE-2100 (LifeLabs and BCBio) as well as Sysmex XT-2000i, XS-1000, and PoCHi 100i (select LifeLabs locations) CBC analyzers. Quantitative laboratory test results were identified through review of the laboratory catalogs. Results and affiliated information were extracted. For this analysis, laboratory data were restricted to the CBC with and without differential, as well as some tests used as proxies for possible hematological conditions that can affect CBC parameters (additional exclusion criteria, Supplemental File 1). Self-reported ethnicity information was obtained from the provincial prenatal screening laboratory database. Self-reported ethnicity was chosen from a list of options included on the BC maternal serum screening requisition, and included the following selections: Caucasian, First Nations, Black, East Asian (e.g., Chinese, Japanese, Filipino, Vietnamese, Korean), South Asian (e.g., Indian, Pakistani, Sri Lankan), and Other/mixed race (with a request to specify using a blank space provided).

Data extracts were requested through and prepared by Population Data BC (PopData, <https://www.popdata.bc.ca/about>). Extracts were de-identified and assigned unique patient-specific study identifiers. Laboratory data was linked to demographic and clinical data from the BCPDR for each pregnancy. Gestational age at the time of each laboratory test was calculated as the difference between the date of delivery and the date of blood collection in relation to the final gestational age reported. Data linkage and exclusions are diagrammed in Supplemental File 1, using the WBC analysis for illustration.

### STATISTICAL ANALYSIS

*Covariate analysis.* The impact of pregnancy characteristics including maternal age, pre-pregnancy BMI, smoking status, maternal group B Streptococcus status, ethnicity, and use of in vitro fertilization (IVF), were assessed using mixed-effects linear regression, adjusting for the effect of gestational age, multiple CBC results within a pregnancy, and testing laboratory. The effect of laboratory on CBC results was assessed graphically, by comparing data distributions from each testing site and by mixed-effects linear regression, adjusting only for multiple measures and gestational age at sample collection. Boxplots were generated and result mean (95% confidence intervals) and standard error were calculated for all categorical variables. All covariate analysis was completed prior to further outlier removal (see next).

**Reference interval analysis.** After clinical exclusion criteria were applied, statistical outlier detection and removal was performed for each week of gestation using the Tukey or adjusted Tukey method for normal and skewed distributions, respectively, determined by quantile-quantile plots (15, 16). RIs (2.5th and 97.5th percentiles) were calculated using the direct non-parametric rank method as per CLSI EP-28A3c (17). Several partitioning strategies were evaluated. First, RIs were calculated for each trimester separately (T1: 0 to 13 weeks; T2: 14–27 weeks; T3: 28–41 weeks) and differences between trimester partitions were assessed using the method of Harris and Boyd (17, 18). Second, as trimester bins are broad and physiological changes in pregnancy are continuous, RIs were also estimated for each week of gestation. To further investigate changes in laboratory results with gestational age, piecewise linear regression was used. The model was adjusted for maternal age and testing laboratory, and set to estimate 2 gestational age breakpoints to determine when the relationship between CBC result and gestational age changes. The model used the borders of each trimester bin (i.e., 14 and 28 weeks) as initial starting points.

The derived RIs were compared with those calculated using the truncated maximum likelihood and refineR methods of indirect RI establishment using patient datasets (19, 20). Methods were applied to the initial cohort, without applying clinical or laboratory-based exclusion criteria from Supplemental File 1. Results were compared to the nonparametric RI estimates to determine whether the clinical exclusion criteria applied was sufficient to justify direct RI calculations.

Data cleaning, dataset merging and subsetting, and RI calculations were performed using R (v.3.6.1). Cohort demographic summaries and regression analyses were performed using SAS v.9.4 TS Level 1M5 (SAS Institute, Cary, NC).

This study was approved by the UBC Research Ethics Board (H17-00849). Access to data provided by the Data Steward(s) is subject to approval, but can be requested for research projects through the Data Steward(s) or their designated service providers. All inferences, opinions, and conclusions drawn in this publication are those of the author(s), and do not reflect the opinions or policies of the Data Steward(s).

## Results

### COHORT DESCRIPTION

A total of 216 503 live births were included in the 5-year BCPDR extract. After applying exclusion criteria, 121 469 healthy mothers, representing 143 106 unique term singleton pregnancies remained (Table 1). Average maternal age was 30.7 years. Mothers from all

5 geographical health authorities in BC are represented in proportions similar to those of the general population (21). Self-reported ethnicity was available for 28.3% of the cohort. Of these, 60% of mothers self-reported Caucasian ethnicity, 22% East Asian, and 10% South Asian (Table 1), similar to the ethnic distributions of female residents in BC per recent Canadian census data (22). Of the pregnancies, 45% represented the mother's first live birth. More than 972 000 CBC results were available. Most results were from LifeLabs BC and BCBio laboratories (approximately 98%) and spanned gestation (0–41 + 6 weeks), with higher density at 5–12 and 25–30 weeks. Roughly 1%–2% of CBC results were from the CW laboratory where data contribution was more consistent throughout gestation and proportionally higher in the third trimester (Supplemental File 1).

### COVARIATE AND REFERENCE INTERVAL ANALYSIS

Trimester-specific RIs were calculated for 12 CBC parameters; most warranted trimester-based partitioning using the Harris and Boyd method (Table 2) (18). Use of indirect or direct statistical methods for calculating RI limits produced similar results (Supplemental File 1), therefore we only report results from direct methods here. Figures 1–3 illustrate the distribution of test results across gestational age for each CBC parameter. Covariate analysis, segmented regression, and RIs estimated per week of gestation are provided in Supplemental Files 2–13 for each parameter.

RIs for RBC count, hemoglobin, hematocrit, mean corpuscular volume (MCV), and RBC distribution width (RDW) are summarized in Figs. 1 and 3. First trimester values were significantly different from second and third trimesters, warranting partitioning (Table 2). However, average RBC, hemoglobin, and hematocrit values decreased steadily during the first and second trimesters, then remained relatively constant until delivery, raising the question of whether trimester binning is appropriate. Estimated regression breakpoints were similar for RBC count, hemoglobin, and hematocrit at approximately 20- and 30-weeks gestation. Concentrations changed most markedly from 0 to 20 weeks with RBC count and hemoglobin decreasing  $0.03 \times 10^{12}/L$  and 0.76 g/L, respectively, per week of gestation. Results then remained relatively constant until 30 weeks after which values increased at a similar rate until delivery (Supplemental Files 2 and 3). MCV RI upper limit increased, widening the RIs (Fig. 1, Table 2).

Significant associations between several covariates and RBC parameters were detected. These associations were very small, and unlikely to be clinically significant (Supplemental Files 2–6).

| Table 1. Maternal and pregnancy characteristics of the BC pregnancy cohort.                                                                                                                                                                                                                                                                                                                                                                                                                                                 |                    |
|-----------------------------------------------------------------------------------------------------------------------------------------------------------------------------------------------------------------------------------------------------------------------------------------------------------------------------------------------------------------------------------------------------------------------------------------------------------------------------------------------------------------------------|--------------------|
| Variable                                                                                                                                                                                                                                                                                                                                                                                                                                                                                                                    | Mean (SD) or N (%) |
| Number of pregnancies                                                                                                                                                                                                                                                                                                                                                                                                                                                                                                       | 143 106 (100%)     |
| Unique mothers                                                                                                                                                                                                                                                                                                                                                                                                                                                                                                              | 121 469 (84.9%)    |
| Maternal age (years)                                                                                                                                                                                                                                                                                                                                                                                                                                                                                                        | 30.7 (5.2)         |
| Final gestational age at delivery (weeks)                                                                                                                                                                                                                                                                                                                                                                                                                                                                                   | 39.1 (1.2)         |
| Parity                                                                                                                                                                                                                                                                                                                                                                                                                                                                                                                      |                    |
| Nulliparous (N)                                                                                                                                                                                                                                                                                                                                                                                                                                                                                                             | 64 267 (44.9%)     |
| Multiparous (N)                                                                                                                                                                                                                                                                                                                                                                                                                                                                                                             | 78 837 (55.1%)     |
| Conceived by IVF/AR                                                                                                                                                                                                                                                                                                                                                                                                                                                                                                         |                    |
| Unknown                                                                                                                                                                                                                                                                                                                                                                                                                                                                                                                     | 2570 (1.8%)        |
| Unknown                                                                                                                                                                                                                                                                                                                                                                                                                                                                                                                     | 13 408 (9.4%)      |
| Pre-pregnancy BMI                                                                                                                                                                                                                                                                                                                                                                                                                                                                                                           |                    |
| Underweight (<18.50)                                                                                                                                                                                                                                                                                                                                                                                                                                                                                                        | 6435 (4.5%)        |
| Normal (18.5–24.99)                                                                                                                                                                                                                                                                                                                                                                                                                                                                                                         | 67 556 (47.2%)     |
| Overweight (25.00–29.99)                                                                                                                                                                                                                                                                                                                                                                                                                                                                                                    | 20 864 (14.6%)     |
| Obese (≥30.00)                                                                                                                                                                                                                                                                                                                                                                                                                                                                                                              | 10 988 (7.7%)      |
| Unknown                                                                                                                                                                                                                                                                                                                                                                                                                                                                                                                     | 37 263 (26.0%)     |
| Smoking status                                                                                                                                                                                                                                                                                                                                                                                                                                                                                                              |                    |
| Nonsmoking                                                                                                                                                                                                                                                                                                                                                                                                                                                                                                                  | 47 586 (33.3%)     |
| Former                                                                                                                                                                                                                                                                                                                                                                                                                                                                                                                      | 13 066 (9.1%)      |
| Currently smoking                                                                                                                                                                                                                                                                                                                                                                                                                                                                                                           | 8472 (5.9%)        |
| Unknown                                                                                                                                                                                                                                                                                                                                                                                                                                                                                                                     | 73 982 (51.7%)     |
| Group B Streptococcus status                                                                                                                                                                                                                                                                                                                                                                                                                                                                                                |                    |
| Positive                                                                                                                                                                                                                                                                                                                                                                                                                                                                                                                    | 29 549 (20.7%)     |
| Unknown                                                                                                                                                                                                                                                                                                                                                                                                                                                                                                                     | 16 155 (11.3%)     |
| Health authority of residence                                                                                                                                                                                                                                                                                                                                                                                                                                                                                               |                    |
| Interior Health                                                                                                                                                                                                                                                                                                                                                                                                                                                                                                             | 21 435 (15.0%)     |
| Fraser Health                                                                                                                                                                                                                                                                                                                                                                                                                                                                                                               | 54 572 (38.1%)     |
| Vancouver Coastal                                                                                                                                                                                                                                                                                                                                                                                                                                                                                                           | 34 483 (24.1%)     |
| Vancouver Island Health                                                                                                                                                                                                                                                                                                                                                                                                                                                                                                     | 20 561 (14.4%)     |
| Northern Health                                                                                                                                                                                                                                                                                                                                                                                                                                                                                                             | 11 238 (7.9%)      |
| Unknown or out of BC                                                                                                                                                                                                                                                                                                                                                                                                                                                                                                        | 817 (0.6%)         |
| Method of labor induction                                                                                                                                                                                                                                                                                                                                                                                                                                                                                                   |                    |
| Spontaneous                                                                                                                                                                                                                                                                                                                                                                                                                                                                                                                 | 106 317 (74.3%)    |
| Induced                                                                                                                                                                                                                                                                                                                                                                                                                                                                                                                     | 19 031 (13.3%)     |
| No labor                                                                                                                                                                                                                                                                                                                                                                                                                                                                                                                    | 17 754 (12.4%)     |
| Mode of delivery                                                                                                                                                                                                                                                                                                                                                                                                                                                                                                            |                    |
| Vaginal                                                                                                                                                                                                                                                                                                                                                                                                                                                                                                                     | 105 246 (73.5%)    |
| Cesarean section                                                                                                                                                                                                                                                                                                                                                                                                                                                                                                            | 37 860 (26.5%)     |
| Self-reported ethnicity <sup>a</sup>                                                                                                                                                                                                                                                                                                                                                                                                                                                                                        |                    |
| 40 795 (28.5%)                                                                                                                                                                                                                                                                                                                                                                                                                                                                                                              |                    |
| 0.7% Black, 60.3% Caucasian, 21.7% East Asian, 10.2% South Asian, 1.8% Indigenous, 4.4% Other                                                                                                                                                                                                                                                                                                                                                                                                                               |                    |
| <sup>a</sup> Proportions of each ethnicity category are calculated based only on the total number of pregnancies for which ethnicity information was available. Some data are incomplete in the BCPDR and have been categorized as “unknown.” Where cell counts were <5, counts are not reported. Percentages are calculated based on total number of pregnancies in the entire healthy cohort, except for ethnicity in which proportions reported are limited to the number of pregnancies that had linked ethnicity data. |                    |

**Table 2. Trimester-specific RIs for 12 hematology parameters after outlier removal.**

| Analyte (unit)                | Trimester                | Mean | Lower limit | Upper limit | N      | Lower limit 90% CI | Upper limit 90% CI |
|-------------------------------|--------------------------|------|-------------|-------------|--------|--------------------|--------------------|
| RBC count ( $10^{12}/L$ )     | 0–13 weeks               | 4.31 | 3.75        | 4.92        | 75 289 | (3.75, 3.75)       | (4.92, 4.93)       |
|                               | 14–27 weeks <sup>a</sup> | 3.89 | 3.34        | 4.50        | 57 999 | (3.33, 3.34)       | (4.50, 4.51)       |
|                               | 28–41 weeks <sup>a</sup> | 3.94 | 3.36        | 4.58        | 33 970 | (3.35, 3.36)       | (4.57, 4.59)       |
| Hemoglobin (g/L)              | 0–13 weeks               | 128  | 112         | 143         | 75 917 | (112, 112)         | (143, 143)         |
|                               | 14–27 weeks <sup>a</sup> | 117  | 101         | 132         | 59 312 | (100, 101)         | (131, 132)         |
|                               | 28–41 weeks <sup>a</sup> | 118  | 99          | 135         | 34 632 | (98, 99)           | (135, 135)         |
| Hematocrit (L/L)              | 0–13 weeks               | 0.38 | 0.34        | 0.41        | 64 579 | (0.34, 0.34)       | (0.41, 0.41)       |
|                               | 14–27 weeks <sup>a</sup> | 0.35 | 0.31        | 0.38        | 50 606 | (0.31, 0.31)       | (0.38, 0.38)       |
|                               | 28–41 weeks <sup>a</sup> | 0.35 | 0.31        | 0.39        | 29 292 | (0.31, 0.31)       | (0.39, 0.39)       |
| MCV (fL)                      | 0–13 weeks               | 88   | 80          | 94          | 73 701 | (80, 80)           | (94, 94)           |
|                               | 14–27 weeks <sup>a</sup> | 90   | 81          | 97          | 56 913 | (81, 81)           | (97, 97)           |
|                               | 28–41 weeks <sup>a</sup> | 89   | 79          | 97          | 33 596 | (79, 79)           | (97, 97)           |
| RDW (%)                       | 0–13 weeks               | 13.1 | 12.0        | 14.8        | 40 758 | (12.0, 12.0)       | (14.8, 14.8)       |
|                               | 14–27 weeks <sup>a</sup> | 13.4 | 12.4        | 14.8        | 27 640 | (12.4, 12.4)       | (14.8, 14.8)       |
|                               | 28–41 weeks <sup>a</sup> | 13.5 | 12.4        | 15.0        | 17 626 | (12.4, 12.4)       | (14.9, 15.0)       |
| WBC count ( $10^9/L$ )        | 0–13 weeks               | 8.1  | 4.8         | 12.3        | 77 233 | (4.8, 4.8)         | (12.3, 12.3)       |
|                               | 14–27 weeks <sup>a</sup> | 9.4  | 5.9         | 13.8        | 59 626 | (5.8, 5.9)         | (13.7, 13.8)       |
|                               | 28–41 weeks <sup>a</sup> | 9.5  | 6.0         | 14.1        | 34 665 | (6.0, 6.0)         | (14.0, 14.2)       |
| Neutrophil count ( $10^9/L$ ) | 0–13 weeks               | 5.5  | 2.7         | 9.0         | 77 116 | (2.7, 2.7)         | (8.9, 9.0)         |
|                               | 14–27 weeks <sup>a</sup> | 6.8  | 4.0         | 10.6        | 59 586 | (4.0, 4.0)         | (10.5, 10.6)       |
|                               | 28–41 weeks <sup>a</sup> | 6.9  | 4.0         | 10.8        | 38 018 | (4.0, 4.0)         | (10.8, 10.9)       |
| Lymphocyte count ( $10^9/L$ ) | 0–13 weeks               | 1.9  | 1.1         | 3.0         | 76 945 | (1.1, 1.1)         | (3.0, 3.0)         |
|                               | 14–27 weeks              | 1.7  | 1.0         | 2.7         | 59 688 | (1.0, 1.0)         | (2.7, 2.7)         |
|                               | 28–41 weeks              | 1.7  | 1.0         | 2.7         | 34 574 | (1.0, 1.0)         | (2.7, 2.7)         |
| Monocyte count ( $10^9/L$ )   | 0–13 weeks               | 0.6  | 0.3         | 0.9         | 76 370 | (0.3, 0.3)         | (0.9, 0.9)         |
|                               | 14–27 weeks <sup>a</sup> | 0.6  | 0.3         | 1.0         | 58 348 | (0.3, 0.3)         | (1.0, 1.0)         |
|                               | 28–41 weeks              | 0.7  | 0.4         | 1.1         | 31 741 | (0.4, 0.4)         | (1.1, 1.1)         |
| Eosinophil count ( $10^9/L$ ) | 0–13 weeks               | 0.2  | 0.1         | 0.4         | 68 383 | (0.1, 0.1)         | (0.4, 0.4)         |
|                               | 14–27 weeks              | 0.2  | 0.1         | 0.4         | 55 063 | (0.1, 0.1)         | (0.4, 0.4)         |
|                               | 28–41 weeks              | 0.2  | 0.1         | 0.4         | 30 542 | (0.1, 0.1)         | (0.4, 0.4)         |
| Basophil count ( $10^9/L$ )   | 0–13 weeks <sup>b</sup>  | 0.1  | 0           | 0.3         | 77 661 | NA                 | NA                 |
|                               | 14–27 weeks <sup>b</sup> | 0.3  | 0           | 0.6         | 59 785 | NA                 | NA                 |
|                               | 28–41 weeks <sup>b</sup> | 0.1  | 0           | 0.3         | 34 698 | NA                 | NA                 |
| Platelet count ( $10^9/L$ )   | 0–13 weeks               | 252  | 165         | 362         | 71 176 | (165, 166)         | (362, 363)         |
|                               | 14–27 weeks              | 232  | 149         | 339         | 54 377 | (149, 150)         | (337, 340)         |
|                               | 28–41 weeks              | 220  | 133         | 335         | 34 266 | (133, 134)         | (333, 336)         |

<sup>a</sup>Significant difference as per Harris and Boyd relative to first trimester (18).  
<sup>b</sup>RI could not be estimated, minimum and maximum provided. NA.

*Leukocytes.* RIs were established for WBC count, neutrophils, lymphocytes, monocytes, eosinophils, and basophils (Figs. 2 and 3). WBCs and neutrophils increased each trimester justifying RI binning (Table 2).

Piecewise regression determined breakpoints of 6 and 26 weeks for WBCs and neutrophils. Values increased most markedly earlier in gestation (0–6 weeks) (Supplemental Files 7 and 8). For monocytes, trimester-

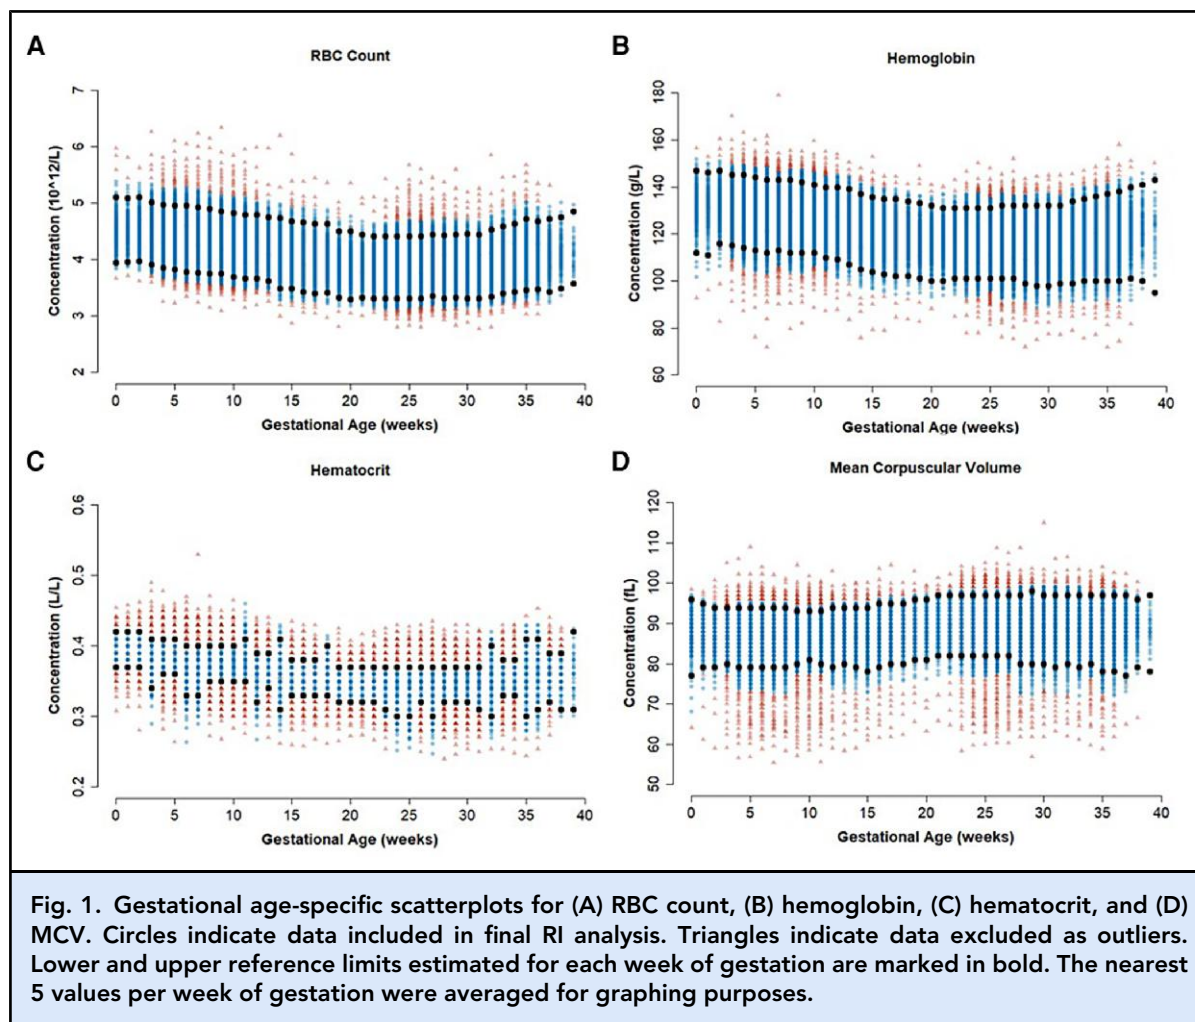

based partitioning was only significant between the first and second trimester, although changes in RI limits were only  $0.1 \times 10^9/L$  across trimesters and piecewise regression did not demonstrate marked quantitative changes in result values. Trimester bins were not indicated for lymphocytes, eosinophils, and basophils. Breakpoint regression demonstrated decreasing lymphocyte counts from 0 to 12 weeks and constant values between weeks 12 and 30, then slightly increasing (Supplemental File 9). These changes affected weekly RIs very minimally, with negligible differences when comparing RIs of week 7 to week 40 (Supplemental File 9). For basophils and eosinophils, RI limits at each week of gestation were identical (Fig. 3), and additional analyses could not be performed.

Covariate analysis for leukocyte parameters revealed statistically significant associations with several covariates (Supplemental Files 7–10) but could not be completed for basophil and eosinophil counts due to categorical data distribution (Supplemental Files 11 and 12).

*Platelets.* Trimester RIs for platelet count were significantly different between the first trimester compared to second and third trimesters (Fig. 3A). RI limits decreased by approximately  $30 \times 10^9/L$  across gestation. In contrast to other parameters, the breakpoint regression model did not suit the data well ( $R^2 = 0.066$ ) due to continuous and similar rate of decrease in platelet count throughout gestation (Supplemental File 13).

Significant associations between several covariates and platelet counts were also detected (e.g., age, prepregnancy BMI, smoking status, and use of IVF) (Supplemental File 13).

## Discussion

In the current study, we defined a cohort of roughly 140 000 healthy Canadian women with uncomplicated pregnancies and leveraged existing clinical laboratory data to establish hematology RIs for each trimester

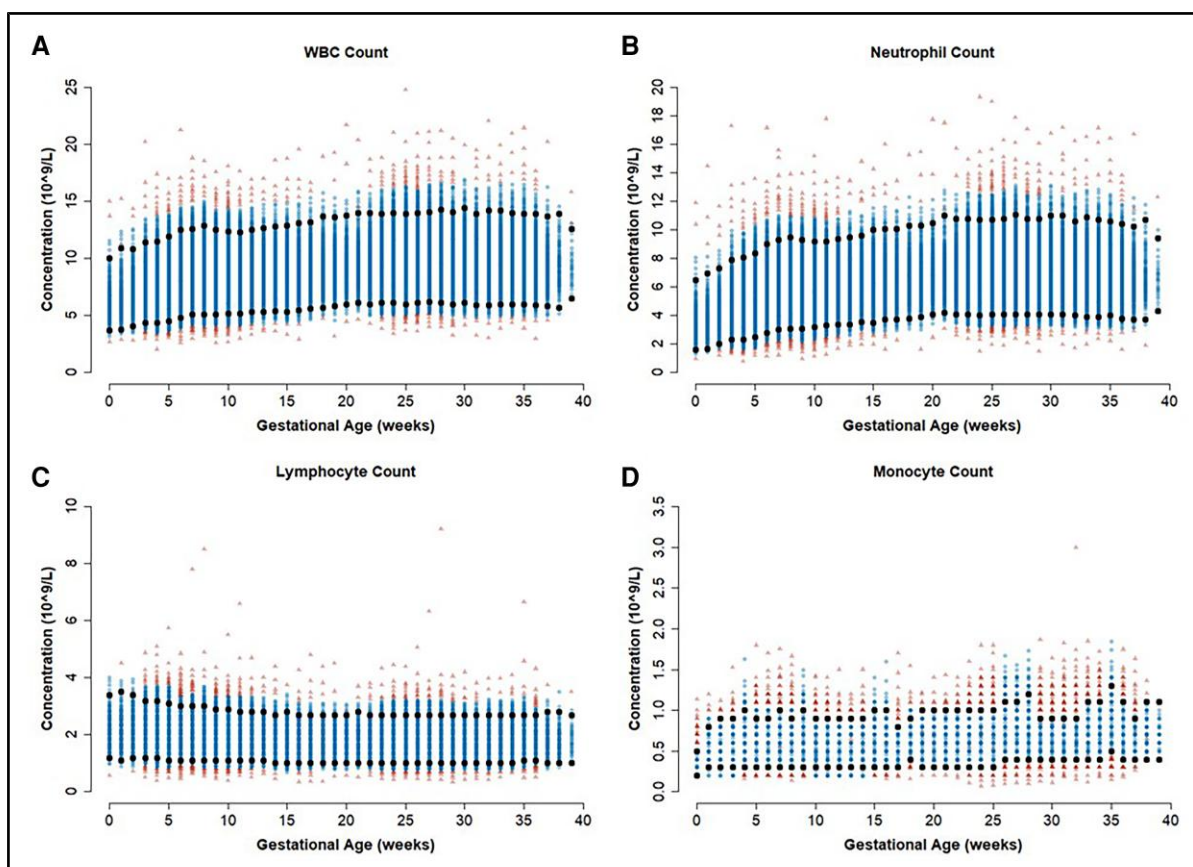

**Fig. 2.** Gestational age-specific scatterplots for (A) WBC count, (B) neutrophil count, (C) lymphocyte count, and (D) monocyte count. Circles indicate data included in final RI analysis. Triangles indicate data excluded as outliers. Lower and upper reference limits estimated for each week of gestation are marked in bold. The nearest 5 values per week of gestation were averaged for graphing purposes.

and week of gestation. Effectiveness of the clinical exclusion criteria applied was confirmed by the similar RI estimations produced using direct and indirect methods, and by comparing our healthy cohort to cohorts defined using other methods which identify complicated pregnancies (i.e., Obstetric Comorbidity Index and Severe Maternal Morbidity index) (23, 24). The derived RIs show that erythrocytes, leukocytes, and platelets change throughout pregnancy and highlight the need for pregnancy-specific test interpretation.

Analysis of RBC indices reaffirm dynamic changes in RBC count, hemoglobin, and hematocrit during pregnancy (6–13, 25). Segmented regression analysis revealed a U-shape pattern, with breakpoints at 20 and 30 weeks. The World Health Organization defines anemia in pregnancy as a hemoglobin level of <110 g/L (26). UK guidelines use a lower cutoff of 105 g/L in the second and third trimester (27). Our data indicate hemoglobin

levels in pregnant women may be as low as 100 g/L in the second or third trimester. Future work evaluating pregnancy and infant outcomes in relation to maternal laboratory values and pregnancy RIs is needed to determine whether the definition of anemia in pregnancy requires revision. Previous studies have established RIs using trimester-specific bins (12, 13) or at specific time-points only (6, 9, 10). Our findings suggest trimester-specific RI bins for RBCs, hemoglobin, and hematocrit mask GA-associated changes, limiting result interpretation. Interestingly, recent dynamic modeling of pre-, post-, and pregnancy laboratory values in a large dataset in Israel support this conclusion as well (25).

MCV and RDW increased slightly across gestation. Trimester-specific increases in MCV were previously reported (9) and are consistent with physiological macrocytosis in pregnancy. While MCV varied by trimester, values were within 80–100 fL, a commonly used non-pregnant RI, and differences are unlikely to be clinically

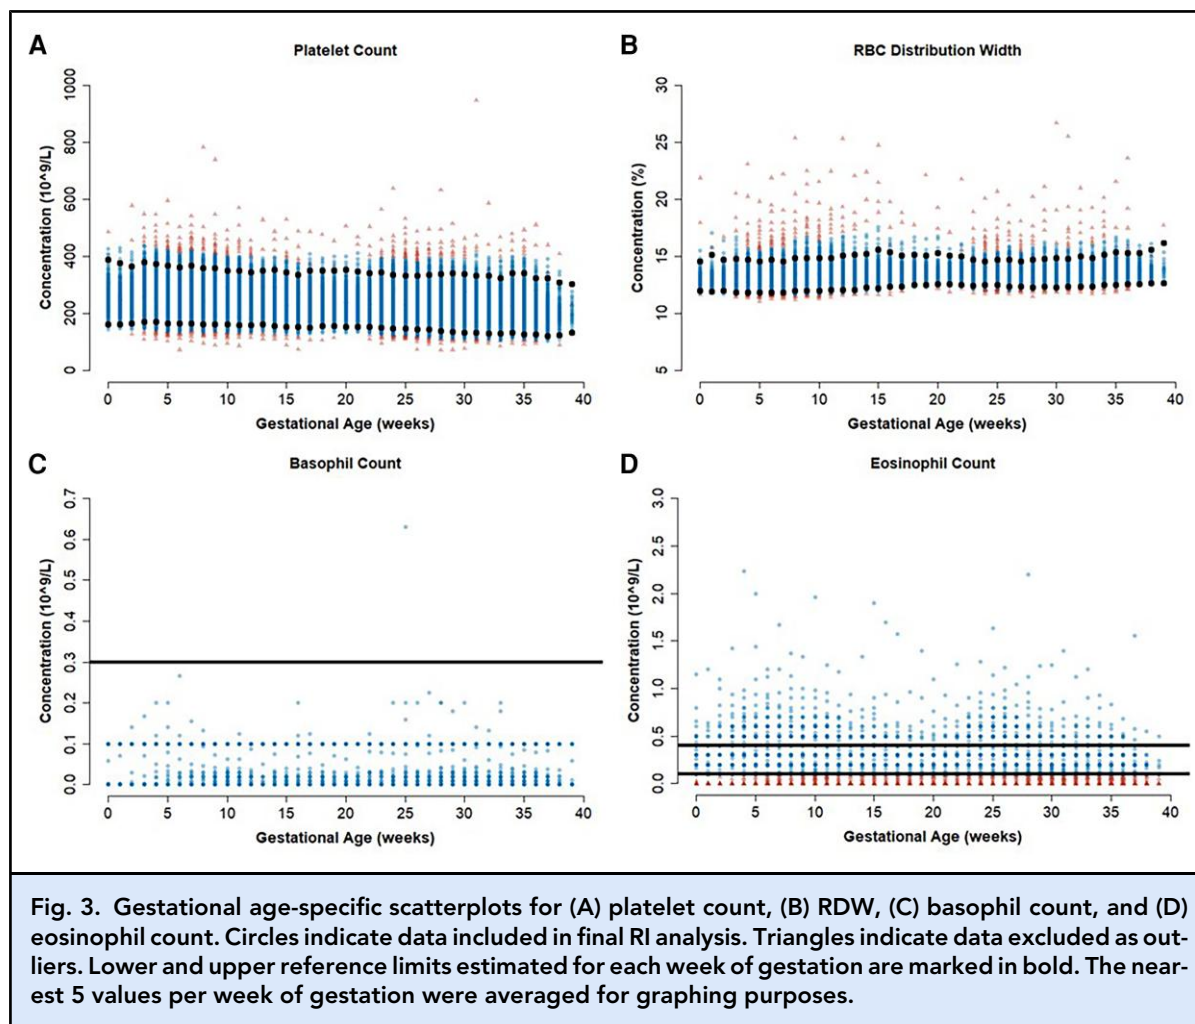

significant (28). A recent systematic review of 28 studies summarizing RDW values in pregnancy reported differences between nonpregnant and pregnant RDW values in addition to increasing values with gestation similar to our findings (29).

Platelet counts decreased steadily throughout gestation in our cohort. Gestational thrombocytopenia ( $<150 \times 10^9/L$ ), particularly in the third trimester, is estimated to occur in 5%–10% of normal pregnancies (30). A recent systematic review identified 46 studies where platelet counts were reported in  $N \geq 30$  women with uncomplicated pregnancies (30). Pooled data showed decreasing platelets with combined trimester means of  $251 \times 10^9/L$ ,  $238 \times 10^9/L$ , and  $224 \times 10^9/L$  (30). However, of the 21 studies that directly compared changes within pregnancy, 11 reported a significant decrease and 10 reported no change (30). Reese et al. evaluated platelet counts in 4568 uncomplicated pregnancies using retrospective data (5). In line with our findings, they reported a decline in platelet counts

beginning in the first trimester and continuing throughout pregnancy (5). Bar et al. report the same trend (25). Platelets form a part of the diagnosis of preeclampsia and HELLP syndrome (hemolysis elevated liver enzymes and low platelet count), where a cutoff of  $<100 \times 10^9/L$  is used to define thrombocytopenia (31). In the present study, we report a third trimester platelet RI of 133–335  $\times 10^9/L$ . Reese et al. similarly reported that 97% of pregnant women had platelet counts  $>125 \times 10^9/L$  (5). Our findings thus support the recommended thrombocytopenia cutoff of  $<100 \times 10^9/L$ , as even in the third trimester, values  $<130$  would be rare in uncomplicated pregnancy (31).

Of the leukocyte indices evaluated, WBC and neutrophil counts changed most across gestation, increasing markedly. Previous studies also reported increasing WBCs across trimesters, predominantly granulocytes (6–13). However, upper limits of WBC count vary across studies, ranging from  $9.7 \times 10^9/L$  to  $15 \times 10^9/L$  in the third trimester. The upper limits in our study



were  $13.8 \times 10^9/L$  and  $14.1 \times 10^9/L$  in the second and third trimester, respectively. The largest increases occurred early in gestation (0–6 weeks) at a rate of  $0.28 \times 10^9/L$  and  $0.31 \times 10^9/L$  per week for WBC and neutrophil count, respectively. No significant RI differences were observed across trimesters for lymphocyte, basophil, and eosinophil counts, similar to other reports (6, 11). Monocyte counts demonstrated a statistically significant difference between the first and second trimester; however, RIs only changed by  $0.1 \times 10^9/L$ . Pregnancy-specific and possibly GA-specific RIs are needed to interpret WBC and neutrophil counts. This is particularly important given that infections contribute significantly to maternal mortality and use of a nonpregnancy RI is not reliable given these rapid changes during pregnancy (32).

An additional outcome of this study is the evaluation of perinatal covariates on hematology indices, including maternal age, pre-pregnancy BMI, use of IVF, group B Streptococcus status, and ethnicity. The association with maternal age was significant, with lower RBCs, hemoglobin, hematocrit, platelets, and WBCs seen with increasing maternal age when adjusted for GA. A RI study of >12 000 healthy Canadian adults did not detect age-specific differences in hematology parameters between 20 and 40 years, with the exception of platelets (partitioned at 14–26 years and 27–79 years) (33). Our findings may suggest age interacts differently with CBC parameters in pregnancy as compared to nonpregnant states, or perhaps that normal pregnancy-related changes occur to a lesser degree in older mothers.

A positive association between pre-pregnancy BMI and RBC count, hemoglobin, hematocrit, platelet count, and leukocyte parameters was observed. BMI correlated negatively with MCV. In nonpregnant individuals, the effect of BMI on RBC indices is debated. A meta-analysis of 26 studies reported that overweight or obese nonpregnant individuals had increased risk of iron deficiency (34). Others report increased RBC and hemoglobin levels in obese individuals (35). Minimal evidence is available in pregnancy, with some studies reporting contrasting findings and suggesting the relationship could change in a trimester-specific manner (36). The observed positive association between pre-pregnancy BMI and leukocytes is expected and may be explained by elevated subclinical inflammatory parameters such as IL-6 and their role in bone marrow granulopoiesis (37).

We also evaluated whether CBC parameters vary with method of conception. In our study, lower RBC count, hemoglobin, RDW, and higher platelet and WBC counts were observed in individuals who had used assisted reproductive techniques relative to those who had not. While statistically significant, the difference in results between groups were minimal (e.g.,

RBC count:  $-0.07 \times 10^{12}/L$ , platelet count:  $3.59 \times 10^9/L$ , WBC count:  $0.27 \times 10^9/L$ ).

The influence of self-reported ethnicity was also assessed. Studies in nonpregnant populations have reported variation in hematology indices, particularly platelets and hemoglobin, across ethnicities (38). In our cohort, hemoglobin was observed to be lower in individuals identifying as Black, East Asian, and South Asian, and First Nation, relative to Caucasian. However, the difference in means was only 1–2 g/L. Platelets were lower in Caucasian populations (mean:  $236 \times 10^9/L$ ) relative to individuals of Black ( $240 \times 10^9/L$ ), East Asian ( $240 \times 10^9/L$ ), South Asian ( $249 \times 10^9/L$ ), and First Nations ethnicity ( $291 \times 10^9/L$ ). It is unclear whether these differences need to be taken into consideration. Further work in this area is needed.

Last, given that data was extracted from 3 different laboratories, differences between laboratories were also assessed and found to be statistically significant (Supplemental Files 2–13). However, the magnitude of these differences was very small, not exceeding allowable performance limits specified by the Institute for Quality Management in Healthcare (a proficiency testing and laboratory accreditation body in Canada), which commonly defines allowable performance limits as 3 times the median method CV. Minimal differences between laboratories was expected since most data was derived from hematology systems from the same manufacturer.

The current findings are derived from a very large and comprehensive cohort of contemporary women and represent the most up-to-date pregnancy RI information applicable to Canadian mothers. Limitations of the current approach include that the BCPDR does not include data on all pregnancies in British Columbia, and while the cohort was restricted to live births only, because the BCPDR does not include data for unattended or home deliveries attended by an unregistered healthcare provider, some pregnancies were not represented. Based on BC Vital Statistics data, 220 737 births were recorded in the province over the same time period, suggesting 98% coverage by the BCPDR (Supplemental File 1). Information regarding iron or other supplement use that may affect CBC values was unavailable, although it is reasonable to assume a majority were taking prenatal vitamins. Geographic characteristics such as altitude that may affect CBC parameters could not be accounted for. Laboratory data were also not comprehensive. While we estimate that up to 80% of laboratory testing during pregnancy may be completed at LifeLabs, laboratory testing performed at other public or private laboratories was not included, and may cause a geographical or other location-based population bias in our cohort. Finally, while a priori clinical exclusions as well as statistical methods for

excluding distinct result distributions from a central healthy RI distribution were employed, no additional consideration was made to exclude or otherwise evaluate individuals who had repeated testing or an unusual frequency of testing performed during pregnancy.

The present study focused on approaches for deriving RIs for pregnant Canadians, and implementation of these findings remains an important future direction faced with significant hurdles such as a lack of GA information in the LIS, challenges integrating granular RI bins in laboratory reports, and illustrating normal vs abnormal dynamics of laboratory values throughout pregnancy.

## Conclusion

Physiological changes of pregnancy impact laboratory values, including the CBC, complicating laboratory test interpretation. Use of existing laboratory and clinical data from comprehensive and well-documented sources provides an alternative and robust means of defining healthy pregnancy cohorts in a retrospective manner to derive RIs and improve laboratory test interpretation and inform future pregnancy RI studies. Individual CBC parameters change differently during pregnancy, and the ability to distinguish normal from abnormal changes requires RI granularity at the level of gestational week, rather than conventional trimester bins.

## Supplemental Material

[Supplemental material](#) is available at Clinical Chemistry online.

**Nonstandard Abbreviations:** RIs, reference intervals; CBC, complete blood count; LIS, laboratory information systems; RBC, red blood cell; WBC, white blood cell; BMI, body mass index; BCPDR, British Columbia Perinatal Data Registry; CW, BC Children's and Women's Hospital; IVF, *in vitro* fertilization; MCV, mean corpuscular volume; RDW, RBC distribution width.

**Author Contributions:** *The corresponding author takes full responsibility that all authors on this publication have met the following required*

*criteria of eligibility for authorship: (a) significant contributions to the conception and design, acquisition of data, or analysis and interpretation of data; (b) drafting or revising the article for intellectual content; (c) final approval of the published article; and (d) agreement to be accountable for all aspects of the article thus ensuring that questions related to the accuracy or integrity of any part of the article are appropriately investigated and resolved. Nobody who qualifies for authorship has been omitted from the list.*

**Authors' Disclosures or Potential Conflicts of Interest:** *Upon manuscript submission, all authors completed the author disclosure form.*

**Research Funding:** This work was funded by a Canadian Institute for Health Research (CIHR) operating grant # FRN151532 to V.E. Barakauskas, K. Adeli, W.-S. Chan, and B. Jung. K. Adeli, March of Dimes Operating Grant (2020–2022), CIHR Foundation Grant (2016–2024). S. Luke, Perinatal Services BC provided financial support for secure research environment access charges (Population Data BC). M.K. Bohn, Canadian Institutes for Health Research Doctoral Award (2020–2023).

**Disclosures:** V.E. Barakauskas, held or holds grant funding for unrelated projects from the Michael Smith Foundation for Health Research, BC Children's Hospital Research Institute, BC Children's Hospital Foundation, and the Rix Family Foundation, and is an employee of the Provincial Health Services Authority. E. Branch has received a British Columbia Graduate Scholarship through The University of British Columbia and a 2021 Robert B. Caton Scholarship from The Vancouver Foundation. A. Boutin has received a Junior I Research Scholar Award from the Fonds de Recherche du Québec—Santé, grant funding from the Fondation de la recherche pédiatrique, and research funds from the Jeanne et Jean-Louis Lévesque Research Chair in Perinatology and the CHU de Québec-Université Laval Research Foundation. S. Luke, new position as Director, Research and Evaluation, with the BC College of Nurses and Midwives; committee member of the Data Stewardship Committee appointed by the Minister of Health.

**Role of Sponsor:** The funding organizations played no role in the design of study, choice of enrolled patients, review and interpretation of data, preparation of manuscript, or final approval of manuscript.

**Acknowledgments:** We wish to thank our colleagues Drs. Cheryl Tomalty, Graham Segal, Wes Schrieber as well as Rhonda Cresswell at LifeLabs BC, Dr. Richard Cleve from C.J. Coody and Associates, and Drs. Kate Chipperfield, Nick Au and Suzanne Vercauteren as well as Steven Gill at BC Children's and Women's hospital lab, for their help in providing method, test code and lab work-flow information needed to understand the extracted data structures; Dr. Shervin Asgari for early statistical and data cleaning consultation; the data stewards for permission to access the data sources, Tim Choi and Joanne Kirton at PopData for guidance in navigating the data access process and BCWHRI for data analysis consultation.

## References

1. Bohn MK, Adeli K. Physiological and metabolic adaptations in pregnancy: importance of trimester-specific reference intervals to investigate maternal health and complications. *Crit Rev Clin Lab Sci* 2022;59:76–92.
2. Lund CJ, Donovan JC. Blood volume during pregnancy. Significance of plasma and red cell volumes. *Am J Obstet Gynecol* 1967;98:394–403.
3. Taylor DJ, Lind T. Red cell mass during and after pregnancy. *Br J Obstet Gynaecol* 1979;86:364–70.
4. Mor G, Aldo P, Alvero AB. The unique immunological and microbial aspects of pregnancy. *Nat Rev Immunol* 2017;17:469–82.
5. Reese JA, Peck JD, Deschamps DR, McIntosh JJ, Knudtson EJ, Terrell DR, et al. Platelet counts during pregnancy. *N Engl J Med* 2018;379:32–43.
6. Klajnbard A, Szecsi PB, Colov NP, Andersen MR, Jørgensen M, Bjørngaard B, et al. Laboratory reference intervals during pregnancy, delivery and the early postpartum period. *Clin Chem Lab Med* 2010; 48:237–48.
7. Jin Y, Lu J, Jin H, Fei C, Xie X, Zhang J. Reference intervals for biochemical, haemostatic and haematological parameters in healthy Chinese women during

- early and late pregnancy. *Clin Chem Lab Med* 2018;56:973–9.
8. Li A, Yang S, Zhang J, Qiao R. Establishment of reference intervals for complete blood count parameters during normal pregnancy in Beijing. *J Clin Lab Anal* 2017;31:e22150.
  9. Milman N, Bergholt T, Byg KE, Eriksen L, Hvas AM. Reference intervals for haematological variables during normal pregnancy and postpartum in 434 healthy Danish women. *Eur J Haematol* 2007;79:39–46.
  10. Odhiambo C, Omolo P, Oyaro B, Williamson J, Kinuthia J, Matemo D, et al. Establishment of reference intervals during normal pregnancy through six months postpartum in western Kenya. *PLoS One* 2017;12:e0175546.
  11. Dockree S, Shine B, Pavord S, Impey L, Vatish M. White blood cells in pregnancy: reference intervals for before and after delivery. *EBioMedicine* 2021;74:103715.
  12. Genetu M, Damtie D, Workineh M, Mathewos Tebeje B, Enawgaw B, Deressa T. Immunological and hematological reference intervals among HIV-seronegative pregnant women in northwest Ethiopia. *Int J Womens Health* 2017;9:145–50.
  13. Fiseha M, Mohammed M, Ebrahim E, Demssis W, Tarekegn M, Angelo A, et al. Common hematological parameters reference intervals for apparently healthy pregnant and non-pregnant women of South Wollo Zone, Amhara Regional State, Northeast Ethiopia. *PLoS One* 2022;17:e0270685.
  14. Perinatal Services BC. British Columbia Perinatal Data Registry. Data Extract. 2018. <http://www.perinatalservicesbc.ca/health-professionals/data-surveillance/perinatal-data-registry> (Accessed October 2023).
  15. Tukey JW. *Exploratory data analysis*. Reading (MA): Addison-Wesley Pub Co.; 1977.
  16. Adeli K, Higgins V, Trajcevski K, White-Al Habeeb N. The Canadian laboratory initiative on pediatric reference intervals: A CALIPER white paper. *Crit Rev Clin Lab Sci* 2017;54:358–413.
  17. CLSI. *Defining, establishing, and verifying reference intervals in the clinical laboratory; approved guideline—third edition*. CLSI document EP28-A3c. Wayne (PA): Clinical Laboratory Standards Institute; 2008.
  18. Harris EK, Boyd JC. On dividing reference data into subgroups to produce separate reference ranges. *Clin Chem* 1990;36:265–70.
  19. Arzideh F, Wosniok W, Gurr E, Hinsch W, Schumann G, Weinstock N, Haeckel R. A plea for intra-laboratory reference limits. Part 2. A bimodal retrospective concept for determining reference limits from intra-laboratory databases demonstrated by catalytic activity concentrations of enzymes. *Clin Chem Lab Med* 2007;45:1043–57.
  20. Ammer T, Schützenmeister A, Prokosch HU, Rauh M, Rank CM, Zierk J. Refiner: A novel algorithm for reference interval estimation from real-world data. *Sci Rep* 2021;11:16023.
  21. British Columbia Government. Regional health authorities. <https://www2.gov.bc.ca/gov/content/health/about-bc-s-health-care-system/partners/health-authorities/regional-health-authorities> (Accessed May 2023).
  22. Government of Canada SC. Census Profile, 2016 Census. <https://www12.statcan.gc.ca/census-recensement/2016/dp-pd/prof/index.cfm?Lang=E> (Accessed January 2021).
  23. Dzakpasu S, Deb-Rinker P, Arbour L, Darling EK, Kramer MS, Liu S, et al. Severe maternal morbidity surveillance: monitoring pregnant women at high risk for prolonged hospitalisation and death. *Paediatr Perinat Epidemiol* 2020;34:427–39.
  24. Metcalfe A, Lix LM, Johnson JA, Currie G, Lyon AW, Bernier F, Tough SC. Validation of an obstetric comorbidity index in an external population. *Br J Obstet Gynaecol* 2015;122:1748–55.
  25. Bar A, Mendelsohn-Cohen N, Kohanim YK, Mayo A, Toledano Y, Alon U. Pregnancy and postpartum dynamics revealed by an atlas of millions of lab tests. Preprint at: <https://www.biorxiv.org/content/10.1101/2023.05.11.540359v1> (2023).
  26. World Health Organization. Haemoglobin concentrations for the diagnosis of anaemia and assessment of severity. <https://apps.who.int/iris/handle/10665/85839> (Accessed May 2023).
  27. Pavord S, Myers B, Robinson S, Allard S, Strong J, Oppenheimer C. UK Guidelines on the management of iron deficiency in pregnancy. *Br J Haematol* 2012;156:588–600.
  28. Aslinia F, Mazza JJ, Yale SH. Megaloblastic anemia and other causes of macrocytosis. *Clin Med Res* 2006;4:236–41.
  29. Paliogiannis P, Zinellu A, Mangoni AA, Capobianco G, Dessole S, Cherchi PL, Carru C. Red blood cell distribution width in pregnancy: a systematic review. *Biochemia Medica (Zagreb)* 2018;28:30502.
  30. Reese JA, Peck JD, McIntosh JJ, Vesely SK, George JN. Platelet counts in women with normal pregnancies: A systematic review. *Am J Hematol* 2017;92:1224–32.
  31. Gestational hypertension and preeclampsia: ACOG practice bulletin, number 222. *Obstet Gynecol* 2020;135:e237–60.
  32. Bonet M, Brizuela V, Abalos E, Cuesta C, Baguiya A, Chamillard M, et al. Frequency and management of maternal infection in health facilities in 52 countries (GLOSS): a 1-week inception cohort study. *Lancet Glob Health* 2020;8:e661–71.
  33. Adeli K, Raizman JE, Chen Y, Higgins V, Nieuwesteeg M, Abdelhaleem M, et al. Complex biological profile of hematologic markers across pediatric, adult, and geriatric ages: establishment of robust pediatric and adult reference intervals on the basis of the Canadian health measures survey. *Clin Chem* 2015;61:1075–86.
  34. Zhao L, Zhang X, Shen Y, Fang X, Wang Y, Wang F. Obesity and iron deficiency: a quantitative meta-analysis. *Obes Rev* 2015;16:1081–93.
  35. Fujita B, Strodthoff D, Fritzenwanger M, Pfeil A, Ferrari M, Goebel B, et al. Altered red blood cell distribution width in overweight adolescents and its association with markers of inflammation. *Pediatr Obes* 2013;8:385–91.
  36. Elmugabil A, Rayis DA, Abdelmageed RE, Adam I, Gasim GI. High level of hemoglobin, white blood cells and obesity among Sudanese women in early pregnancy: A cross-sectional study. *Future Sci OA* 2017;3:FSO182.
  37. Ellulu MS, Patimah I, Khaza'ai H, Rahmat A, Abed Y. Obesity and inflammation: the linking mechanism and the complications. *Arch Med Sci* 2017;13:851–63.
  38. Lim E, Miyamura J, Chen JJ. Racial/ethnic-specific reference intervals for common laboratory tests: A comparison among asians, blacks, hispanics, and white. *Hawaii J Med Public Health* 2015;74:302–10.
